# Supplementary material for: From Insight to Action: Using the COM-B Model to Explore Behaviour Determinants in Pre-Diabetes Programs
Source: Research Square preprint supplement (doi:10.21203/rs.3.rs-7046125/v1), 2025-07-29
Supplement: Supplementary file 1 [file 201da8a67d66e2e8b9a6e758.docx]

| **Commonalities & Differences in Prediabetes Intervention in CTM / AWDPP & WISE** | | | |
| --- | --- | --- | --- |
| **Elements** | **All Wales Diabetes Prevention Programme (AWDPP)** | **Wellness Improvement Service (WISE)** | |
| **Access into the service  Patient Searches and direct referrals** | 3 monthly searches in all practices using AWDPP search template and direct referrals from September 23 | 12 monthly searches as per WISE Health Check template | |
| **Inclusion** | HbA1c 42 - 47 mmol/mol (within the last three months) must be 18 - 79 | HbA1c 42 - 47 older than 3 months, ages 18 - 75 | |
| **Exclusion** | Ever diagnosed with T1/T2 diabetes Current BMI <20kg/m2 Currently prescribed metformin or other Medications which lower blood glucose Receiving palliative care, are pregnant or Artificially fed 80 years old and above | As per AWDPP | |
| **Clinical Triage** | AWDPP SOP for escalation followed by HCSW and appropriate pts flagged for review by DT | Clinical triage followed by clinical pathway. Clinicians to review any flagged patients for review | |
| **Patient Invitation Process** | From search, patients are invited via standard AWDPP letter sent from AWDPP. Up to two invitation phone calls given to non-responders to letter by Dietetic Assistant Practitioner that delivers the brief intervention. | Invites sent from WISE Health Check team or GP surgery both with GP practice headed paper. Where appropriate and the facility is available, text message reminders will be sent to patients. Patients may also be called by telephone without a letter to enable clinic capacity. | |
| **Brief Intervention** | 45-minute brief intervention (BI) with a HCSW As per AWDPP brief intervention model, includes objective measure of weight, height, BMI, motivational interviewing (MI) informed approach and goal setting. | 40-minute brief intervention - SPPC WISE Health Check also undertakes physiological measurements to help support GP practices including BP, pulse, waist circumference, height & weight. Lifestyle questions are asked including smoking/alcohol status etc | |
|
| **User Resources** | 1. Diabetes UK Information Prescriptions: Eat Well 2. Diabetes UK Information Prescriptions: Be Active 3. Eat well Guide 4. Let’s Prevent Diabetes Flyer with QR code 5. AWDPP Information leaflet | Alternative resources used: Diabetes UK: Know Your Risk, British Heart Foundation Food Labels Booklet (optional), Let's Prevent Diabetes Flyer. | |
| **Model of Delivery** | Patients invited to clinic for F2F, virtual or telephone consultations. Patients can attend any clinic venue within the cluster. Clinics are held on an ongoing basis. | All BI's are F2F. Patient only attend clinics held in their own practice. HCSW runs clinic based on yearly search numbers and once complete, leaves practice and returns for 12 month follow up. | |
| **Number of Interventions** | One (45mins) BI appointment with a AWDPP HCSW **Total intervention - 45 mins** | All patients receive a 1x BI appointment with HCSW and those patients who have attended the intervention are signposted to 6 month dedicated support from a trained Lifestyle Advisor who will help to support behaviour change in patients via 1:1 appointment. Variable input from Lifestyle Advisors up to 6 months. Total intervention - 40 minutes minimum and up to 6.5 hours maximum | |
| **12 Month Follow up** | 12 month follow up appointment with HCSW | As per AWDPP | |
| **Reported Outcomes/Measures** | Measurable reported: HbA1c reduction at 12 months Patients identified via search Invitations sent to attend Consultations booked Consultations completed Reach/engagement with the programme (consultations booked from invitations sent % Uptake (completed consultations only) % Patients referred to Weight Management services  % Patients referred to Physical Activity services % Patients referred to other services % Attendance rate (consultations completed/consultations booked)   **EQ5D (health-related quality of life measure) • Comorbidities • Disability • Goals agreed** | As per AWDPP with the addition of % uptake to Lifestyle Advisor Service following signposting. We do not use the EQ5D health questionnaire. | |
| **Additional Clinical Support** | Only additional clinical support is Dietitian if required | Clinical Nurse Specialist will see patients if additional support required for initiation of medication/treatment. The CNS will see patients 1:1 for concerns such as high blood pressure, AF etc. | |
| **Training** | All staff undertake training as outlined by the AWDPP National Leads. This includes Level 2 Community Food & Nutrition skills, AWDPP training, VISION & EMIS training, Attend Anywhere, Introduction to MI and ongoing MI supervision and support Via MINT trainer, MECC | As per AWDPP but do not access Attend Anywhere training as not required**. Level of quality assurance required for Lifestyle Advisors not stated** | |
| **Quality Assurance** | All HCSW's are quality assured by a Lead Dietitian who also works with SPPC team | As per AWDPP with Clinical Nurse Specialist / Lead Nurse sign off for SPPC clinical competencies. Lifestyle Advisors did not receive ongoing support and quality assurance of nutrition related messages which was identified as a gap by dietetics and picked up jointly to agree further actions | |
| **Evaluation** | Reduction in HbA1c as 12 month follow up | As per AWDPP but measurables of reduction in blood pressure reading as per physiological measurements |  |
| **Implementation Groups** | Local implementation group with all stakeholders National implementation group and community of practice across Wales | The membership for the SPPC meetings is in discussion | |
