# Supplementary material for: From Insight to Action: Using the COM-B Model to Explore Behaviour Determinants in Pre-Diabetes Programs
Source: Research Square preprint supplement (doi:10.21203/rs.3.rs-7046125/v1), 2025-07-29
Supplement: Supplementary file 3 [file fcba3793d27c38392e2dd2ec.docx]

**Interview Schedule**

Hello, my name is …….. I am a researcher from Cardiff Metropolitan University. I am here to have a discussion with you on the experiences of participating in the diabetes prevention programme. The information we gather from this discussion, based on your experiences, will provide insight into the whole diabetes prevention programme and inform future programmes.

I believe you have all had the opportunity to read and understand the participation information sheet. Does anyone have any questions?

**If they have no questions (or if you have addressed the questions they have asked), then continue to the next point below.**

For this discussion, there are no right or wrong answers, and every experience is important. While I will be moderating the process, it should be more of an interactive discussion among you about the questions that will be asked. So feel free to share your thoughts about your experiences and also feel free to disagree with each other but do so respectfully.

For a smooth running of the discussion, I would like us to observe the following:

- Let us try not to talk over each other. This would affect transcription and may affect the data and the final report.
- Let us switch off mobile phones or put them on silent mode.
- If anyone has to leave, for example to use the toilet, quietly leave and when you return quietly have your seat and continue participating in the discussion.

To facilitate transcription and analysis, I will record the discussion with your permission. Are you happy for me to record?

Are you happy for us to start the discussion now?

THE FOCUS GROUP DISCUSSION STARTS

Warm-up question: What does the term Diabetes mean to you?

**To start the discussion, could you describe how you felt when you learned about the prediabetes?**

Probes

*Why?*

*Could you elaborate?*

*- How and when did you hear about it for the first time?*

**After knowing about the prediabetes status, you have, in the past few months, participated in a diabetes prevention programme. What would you say encouraged you to participate in the programme?**

Probes

*Why was participation important to you?*

*What were your expectations?*

*And fears?*

*If you shared it with any of your friends and relatives how did they reacted?*

**From the time that you participated in the programme, what skills for diabetes prevention have you learned from it?**

Probes

*How?*

*Could you elaborate?*

*What have you changed in your daily life (if you changed anything)?*

**What do you do now in relation to diabetes prevention that you did not do before participation in the programme?**

Probes

*Why?*

**What would you say, at work and/or home environment, supported your implementation of the recommendations from the programme?**

Probes

*Around:*

*Diet management?*

*Weight management?*

*Exercise/physical activity?*

*How so?*

- What about hindrances?

**What would you say, in the social network, supported you in following the advice and recommendations?**

*Around:*

*Diet management?*

*Weight management?*

*Exercise/physical activity?*

*How so?*

**What about hindrances?**

Probes

*Why?*

*How?*

**Reflecting on the process, from learning about the prediabetes status to the interaction with the HCSW and the referral to the various support services, what do you think are the strengths of the programme?**

Probes:

*What went well?*

*What didn’t go quite well?*

*What about weaknesses, if any?*

*How they could improve the programme?*

**How do you think your participation in the programme affected the health choices you made around diabetes prevention?**

Probes

*What has changed?*

*Could you elaborate that?*

**What do you think could be done to strengthen the programme (thinking about some of the weaknesses you mentioned earlier)? Add the statement in brackets if they mentioned any weaknesses earlier in the discussion.**

**These are the issues I wanted to discuss with you. Are there any issues about your experiences of participation in the diabetes prevention programme That you think is important and I have not asked? Feel free to talk about them. Anything?**

**Once again, thank you very much for taking the time to participate in this discussion. Are you happy for the interview to stop and I can stop the recording now?**
