# Supplementary figures and images for: From Insight to Action: Using the COM-B Model to Explore Behaviour Determinants in Pre-Diabetes Programs
Source: Research Square preprint supplement (doi:10.21203/rs.3.rs-7046125/v1), 2025-07-29

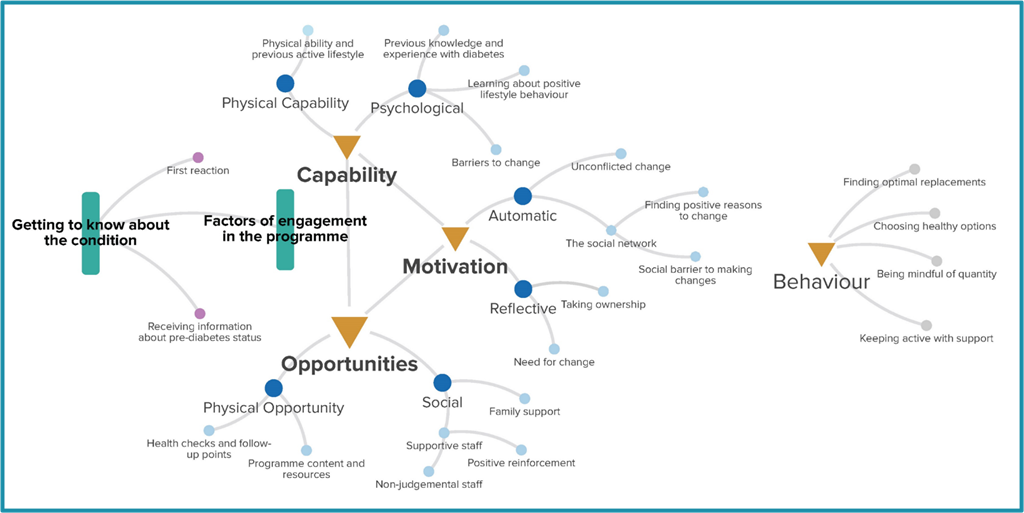

Supplement: Supplementary file 2 [file 551cdd2afc1173ed8763af95.docx]
